# Supplementary material for: Development of PCR-Based Race-Specific Markers for Differentiation of Indian Fusarium oxysporum f. sp. cubense, the Causal Agent of Fusarium Wilt in Banana
Source: MDPI journal article supplement (doi:10.3390/jof8010053), 2022-01-05
Supplement: s1 [file s1]

**Supplementary Table S1.** Details of reference *Foc* isolates (and their VCGs status) used in this study.

| <b>S. No.</b> | <b><i>Foc</i> isolate number</b> | <b>VCG status of the isolate</b> |
|---------------|----------------------------------|----------------------------------|
| 1             | 24662                            | 01213                            |
| 2             | Thai-7-24192                     | 0125                             |
| 3             | W93/395 Aus                      | 0124                             |
| 4             | W93/404                          | 0125                             |
| 5.            | Mal 58                           | 01217                            |
| 6.            | Thai-6-1                         | 0124                             |
| 7             | Aus 23997                        | 0128                             |
| 8             | Thai 6-1                         | 0124                             |
| 9             | Taiwan 194                       | 01213/16                         |
| 10            | W92/276                          | 0129                             |
| 11            | Mal 42                           | 01216                            |
| 12            | Mal 33                           | 01218                            |
| 13            | Phil 8                           | 0123                             |
| 14            | 23746                            | 0120                             |
| 15            | India 6                          | 0124/5                           |
| 16            | India 1                          | 0125                             |
| 17            | Phil 6                           | 0126                             |
| 18            | RPSTNP                           | 01212                            |
| 19            | 24219                            | 01220                            |
| 20            | Indo 20                          | 0120                             |
| 21            | 23631                            | 01211                            |
| 22            | F9130                            | 0121                             |
| 23            | 23630                            | 01210                            |

**Supplementary Table S2.** List of primers designed specific to *Foc* races and their Gene ID.

| S. No.                 | Gene ID            | Forward primer        | Reverse primer       |
|------------------------|--------------------|-----------------------|----------------------|
| <b><i>Foc</i> R1</b>   |                    |                       |                      |
| 1                      | XM_018396005.1     | CTTACCAATTGGGGGCGTCT  | GGTAGGTTGCGAACACCAGA |
| 2                      | XM_018396005.1     | TTGGGGCAAGGCATACAAGT  | AGACGCCCCCAATTGGTAAG |
| 3                      | XM_018396005.1     | TTCCAATCAGCTTGGGGCAA  | GAGACGCCCCCAATTGGTAA |
| 4                      | XM_018394505.1     | CTGAGCAGGAGGAAGCTCGAC | AAAGGCGGCTTCGGACATAA |
| 5                      | XM_018394505.1     | CCTCCGATACGGCTGATGAC  | CCAACGTCTCGGTAACCAGT |
| 6                      | XM_018394505.1     | TACCTCCTTGGTCGACAGGT  | CAGACTTCCAACGTCTCGGT |
| 7                      | XM_018394754.1     | GAATCTCTGCGCCTCGATGA  | CGACAACATTAGAGCGCACG |
| 8                      | XM_018394754.1     | TGCGCCTCGATGACATTGTT  | ACCGACAACATTAGAGCGCA |
| 9                      | XM_018394754.1     | ACTTCTGAATCTCTGCGCCTC | GGTGGGCCTTGGTCATAGAG |
| <b><i>Foc</i> R4</b>   |                    |                       |                      |
| 10                     | XM_031217723.1     | GCCATGCTATTCCAACGATT  | CATCCATTCTGCTGGGTTTT |
| 11                     | XM_031217723.1     | CAAAGCAGCTCTGACCATCA  | GGCAAGGATACCGCAGAATA |
| 12                     | XM_031217723.1     | GCTATCCTGTGCACGATCCA  | TGGTCAGAGCTGCTTTGGAG |
| 13                     | XM_031196942.1     | GAAGTCGACACCCACGAAGT  | AATTGTTGAACTGCAGCGGC |
| 14                     | XM_031201004.1     | GACTTCGTCACCCGCTACAA  | CCGAGAACTGCCGGTAGATC |
| 15                     | XM_031214609.1     | AGAAGATCCTTACTGCCGCG  | GTCACCGAACCAGTCTTCGT |
| 16                     | XM_031214609.1     | GACCGTCTGACCAATGATGC  | TTTTCGAAGGTGGTCTGCAG |
| 17                     | XM_031212605.1     | TATCGGCATCTTCCAGTCGC  | CGAGATCACCGTGGAGATGG |
| 18                     | XM_031212605.1     | AGGCCTGATCACGATTCCAA  | CGCAGGTACAGAGTGTCGTA |
| 19                     | XM_031212517.1     | GTCGAAGGCCAGGAAGTGAA  | GAGTGCGGATAGCCCTCTTC |
| 20                     | XM_031216888.1     | GATTTCTCGACAACCAGGTG  | TTCTGCACACCGTCGATGAT |
| 21                     | XM_031212870.1     | GAAATTCCGGAAAAGCGCGT  | TTGAGCTCTTCCACCAGCTG |
| 22                     | XM_031210754.1     | AACATCCTGTGCGCGAAGTA  | CGATGGTGTACTCGTGCTTG |
| 23                     | XM_031209143.1     | GGGTGAAGGGAGTGAAGCTC  | AGCTGCATCAAACAAGCGTG |
| 24                     | XM_031209143.1     | GAAGTCGGCGTTTCATGGATC | TCAAACAAGCGTGCCAATGA |
| 25                     | XM_031203181.1     | AACAACAACACCCCGTCTCTC | TGTAGACGCTGCGCAGATAG |
| 26                     | XM_031207491.1     | ATCTCGAACAACAACACCCC  | TCCTGCTCGCTGATGTAACC |
| 27                     | XM_031214567.1     | CGCGGCATCAACAAAGTCAT  | CGGAATATCGTCGTCAGCGA |
| 28                     | XM_031204365.1     | AAGTCATCCTGGTCGGCAAT  | CCGTAGTTGCCACCACCG   |
| 29                     | XM_031217424.1     | CCAGGATGAGAAGACCCTGC  | GGGAATTCACCGGTCTCGTT |
| 30                     | XM_031198305.1     | GGCATGTCTTCGCACTACAG  | TGGAATCATGCGCATCACTG |
| 31                     | XM_031213605.1     | CAGGAGAGTCTTGCTTGCCA  | AAACCCCTTGACACTGGTG  |
| 32                     | XM_031213605.1     | CGATCCATCTACCACTGCCT  | CGGGCCGTAAAGTTTCGTAG |
| 33                     | XM_031209245.1     | GCGGATCTTCGTCGGGTAAT  | CCAATGACTTCCTCGGCTGT |
| 34                     | XM_031209245.1     | CATCCAGGCTGCCAAGAATC  | CTAAAGTGCCATATCCGCCG |
| 35                     | XM_031209245.1     | AGCCAATCAGAAGCTCTGCA  | ATGCGAGAGATGTTGAGCCG |
| 36                     | XM_031209245.1     | TCTGCATTGCTATCTTCGGC  | AATGCGAGAGATGTTGAGCC |
| 37                     | XM_031197279.1     | CCATCATTACCCGTCCCTCG  | TCCAGCATGATCTTCTCCGC |
| 38                     | XM_031216382.1     | CTGTCACCCCATGTGCTACT  | AGCATGATCTTCTCCGCCAG |
| 39                     | XM_031211465.1     | CCTGTTCAATGCCTTCGAGC  | CTCACAACGCAGGATGGACT |
| 40                     | KX434998.1 (SIX1)  | TGATTTGCCGTGGAATGACA  | TGGTCTTGACACGACCCA   |
| <b><i>Foc</i> TR4</b>  |                    |                       |                      |
| 41                     | KF548063.1 (SIX8a) | CGCACTCTTACGTTGAGGAT  | TCCACGCAACACTAGCTACT |
| <b><i>Foc</i> STR4</b> |                    |                       |                      |
| 42                     | XM_031212766.1     | CTTCGAGCTGACCATTTCGG  | CAGCGAATCGAAGTACAGCG |
| 43                     | XM_031208009.1     | CCAAGAACAACCGAAGCCG   | GTTGGCAGTCATCCAGGTGA |
| 44                     | XM_031197922.1     | TCGCCAAGAACAACCGAAG   | TTTTGAAGCCCCACCAATCG |
| 45                     | KX434398.1 (SIX7)  | GCGCAAGTAGTCTTGCTTCC  | ATTAAGCGGTTGGCGTATTG |

Supplementary Figure S1. Forward and reverse primers binding site (A) and DNA sequence alignment of hypothetical protein (B) for *Foc* R1 of *Foc*R1F/*Foc*R1R.

A.

Results for linear 323 residue sequence "XM\_018394505.1 Fusarium oxysporum f. sp. lycopersici 4287 hypothetical protein partial mRNA" starting "TACCTCCTTG"

>>>F>>> 1 to 20

1 TACCTCCTTGSTCGACAGGTAGCCGGTCACTCCAGCGTTGAGGGCTACATCTCGGCTCTTATTGAGGCTACCGCTGTGTGAGATTGAC

1 10 20 30 40 50 60 70 80

1 ATGGAGGAACCACTGTCCATCGGCCAGTCAGGTGCAACTCCCGATGTAGAGCCGAGAATAAGCTCCGATGGGACACAGCTCTAACTG

91 TGTGGGATGGCAACTCTGGGCAAGCCGAGGTCAACCAAGGTCAAGGCTTACGACCTCGATTAGTTTCCGTGAGGTATAGCCACGATC

91 100 110 120 130 140 150 160 170

91 ACGACCCCTACCGTTGAGACCGCTCGGGCTCCAGTTGGTGGCAGTGTGGAATGCTGGAGCTAATCAAAGGCACTCCAGTATCGGTGCTAG

181 AATAAGTATGCCTTTGTTAAGTCGAGGTTCCCTCTCTGGATCCCCCTCGAAGTTCATTGCAACCTAATCAGCAAGCCATCATGGTCAAC

181 190 200 210 220 230 240 250 260

181 TTATTATACGGAACAATTTCAGCTCCAAGGGAGAGACCTAGGGGAGCTTCAAGTAACGTTGGGATTAGTCGTTCCGTAGTACCAAGTTG

<<<R<<< 304 to 323

271 ATTATGAGGAGGTCCTTCGGCTCTCGACTGGTTACCGAGACGTTGGAAGTCTG

271 280 290 300 310 320

271 TAATACTTCTCCAGAAGCCGAGAGCTGACCAATGGCTCTGCAACCTTCAGAC

B.

|                                     |                                                                                                                                                                         |
|-------------------------------------|-------------------------------------------------------------------------------------------------------------------------------------------------------------------------|
| 1. VCG0125 CM028857.1 Chr-15        | T A C C T C C T T G G T C G A C A G G T A G C C G G T C A G T C C A G C G T C G A G G G C T A C A T C T C G G T T C T T A T T C G A G G C T G C C G C T G T G T C G A G |
| 2. VCG0124 CM027183.2 Chr-15        | T A C C T C C T T G G T C G A C A G G T A G C C G G T C A G T C C A G C G T C G A G G G C T A C A T C T C G G T T C T T A T T C G A G G C T G C C G C T G T G T C G A G |
| 3. VCG0120 CM028827.1 Chr-15        | T A C C T C C T T G G T C G A C A G G T A G C C G G T C A G T C C A G C G T C G A G G G C T A C A T C T C G G T T C T T A T T C G A G G C T G C C G C T G T G T C G A G |
| 4. VCGVCG01213/16 CM026318.2 Chr-15 | T A C C T C C T T G G T C G A C A G G T A G C C G G T C A G T C C A G C G T C G A G G G C T A C A T C T C G G T T C T T A T T C G A G G C T G C C G C T G T G T C G A G |
| 5. VCG01220 CM028842.1 Chr-15       | T A C C T C C T T G G T C G A C A G G T A G C C G G T C A G T C C A G C G T C G A G G G C T A C A T C T C G G T T C T T A T T C G A G G C T G C C G C T G T G T C G A G |
| 6. XM 018394505.1 F04287            | T A C C T C C T T G G T C G A C A G G T A G C C G G T C A G T C C A G C G T C G A G G G C T A C A T C T C G G T T C T T A T T C G A G G C T G C C G C T G T G T C G A G |
| 1. VCG0125 CM028857.1 Chr-15        | A A C C C T A A T C A G C A A G C C A T C A T G G T C A A C A T T A T A A A G G A G G C C T T C G G C T C T C G A C T G G T C A C T G A G A C G T T G G A A G C T G     |
| 2. VCG0124 CM027183.2 Chr-15        | A A C C C T A A T C A G C A A G C C A T C A T G G T C A A C A T T A T A A A G G A G G C C T T C G G C T C T C G A C T G G T C A C T G A G A C G T T G G A A G A C T G   |
| 3. VCG0120 CM028827.1 Chr-15        | A A C C C T A A T C A G C A A G C C A T C A T G G T C A A C A T T A T A A A G G A G G C C T T C G G C T C T C G A C T G G T C A C T G A G A C G T T G G A A G A C T G   |
| 4. VCGVCG01213/16 CM026318.2 Chr-15 | A A C C C T A A T C A G C A A G C C A T C A T G G T C A A C A T T A T A A A G G A G G C C T T C G G C T C T C G A C T G G T C A C T G A G A C G T T G G A A G A C T G   |
| 5. VCG01220 CM028842.1 Chr-15       | A A C C C T A A T C A G C A A G C C A T C A T G G T C A A C A T T A T A A A G G A G G C C T T C G G C T C T C G A C T G G T C A C T G A G A C G T T G G A A G A C T G   |
| 6. XM 018394505.1 F04287            | A A C C C T A A T C A G C A A G C C A T C A T G G T C A A C A T T A T A A A G G A G G C C T T C G G C T C T C G A C T G G T C A C T G A G A C G T T G G A A G A C T G   |

Supplementary Figure S2. Forward and reverse primers binding site (A) and DNA sequence alignment of SIX8a (B) for *Foc* R4 of *Foc*R4F/*Foc*R4R.

A.

Results for linear 198 residue sequence "KF548063.1\_Six8a\_INDO 155" starting "CGCACTCTTA"

>>>F>>> 1 to 20

|   |                                                                                                           |
|---|-----------------------------------------------------------------------------------------------------------|
| 1 | CGCACTCTTACGTTGAGGATGGACAGAACTAGGGGCGGAGGGACATCGAACGTGCTTGTCCCTTTTGAGCGGGGAGCGCTATCACATGCGGTACGGGAAGTAGTC |
| 1 | 10 20 30 40 50 60 70 80 90 100                                                                            |
| 1 | CGGTGAGAATGCAACTCCTACCTGTCTTGATCCCGCCTCCCTGTAGCTTGACAGAACAGGAAAACTCGCCCCCTCGGATAGTGTACGCCATGCCCTTCATCAG   |

>>>R>>> 179 to 198

|     |                                                                                               |
|-----|-----------------------------------------------------------------------------------------------|
| 106 | CAGATCATGCCGGGTGAGGTGAAGAGCTTAGCTACTTTAGGTGCATCGACTGTCCAGTTTATAAACAATTGGTAGTAGCTAGTGTGGTGGGA  |
| 106 | 110 120 130 140 150 160 170 180 190                                                           |
| 106 | GTCTAGTACGGCCCACTCCACTTCTCGAATCGATGAAATCCAGTAGCTGACAGGTCAAATATTTGTTAACCATCATCGATCACAAACGCACCT |

B.

|                                 |                     |                                                 |                    |
|---------------------------------|---------------------|-------------------------------------------------|--------------------|
| 1. CM026317.2 VCG01213/16 SIX8a | CGCACTCTTACGTTGAGGA | TGGACAGAACTAGGGGCGGAGGGACATCGAACGTGCTTGTCTTTTGA | CGGGGGAGCGCTATCACA |
| 2. CM028626.1 VCG0120 SIX8b     | CGCACTCTTACGTTGAGGA | TGGACAAAACTAGGGGTGAACGGATATCGAACGTGCTTGTATTTTGA | CGGGGGAGCGCTATCACA |
| 3. KF548063.1 Six8a INDO 155    | CGCACTCTTACGTTGAGGA | TGGACAGAACTAGGGGCGGAGGGACATCGAACGTGCTTGTCTTTTGA | CGGGGGAGCGCTATCACA |
| 4. MN417222.1 Foc4 SIX8         | CGCACTCTTACGTTGAGGA | TGGACAGAACTAGGGGCGGAGGGACATCGAACGTGCTTGTCTTTTGA | CGGGGGAGCGCTATCACA |
| 5. KF548064.1 Six8b Foc22615    | CGCACTCTTACGTTGAGGA | TRGACAGAACTAGGGGCGGAGGGATATCGAACGTGCTTGTATTTTGA | CGGGGGAGCGCTMTACA  |

  

|                                 |                                                                  |                     |
|---------------------------------|------------------------------------------------------------------|---------------------|
| 1. CM026317.2 VCG01213/16 SIX8a | CGGGTGAAGTGAGAGCTTAACTATTTAGGTGCATCGACTGTCCAGTTTATAAACAATTGGT    | AGTAGCTAGTATTGCGTGG |
| 2. CM028626.1 VCG0120 SIX8b     | CGGGTGCGGTGAGGAACCTTAGCTACTTTAGGTGCATCGACTGTCCAGTTTCTACACAATTGGT | AGTAGCTAGTATTGCGTGG |
| 3. KF548063.1 Six8a INDO 155    | CGGGTGAAGTGAGAGCTTAACTATTTAGGTGCATCGACTGTCCAGTTTATAAACAATTGGT    | AGTAGCTAGTATTGCGTGG |
| 4. MN417222.1 Foc4 SIX8         | CGGGTGAAGTGAGAGCTTAACTATTTAGGTGCATCGACTGTCCAGTTTATAAACAATTGGT    | AGTAGCTAGTATTGCGTGG |
| 5. KF548064.1 Six8b Foc22615    | CGGGTGAAGTGAGAACTTGGCTACTTTAGGTGCATCGACTATCCAGTTTCTTACCAATTCT    | CTAGATAGTATTGCGTGG  |

Supplementary Figure S3. Sequence comparison of SIX1a (A) and forward and reverse primers binding site (B).

A.

|                                                                                             |                                                              |                         |                          |                                                               |
|---------------------------------------------------------------------------------------------|--------------------------------------------------------------|-------------------------|--------------------------|---------------------------------------------------------------|
| Fusarium oxysporum f. sp. cubense strain BC2-4 chromosome 14, whole genome shotgun sequence |                                                              |                         |                          |                                                               |
| Sequence ID: <a href="#">CM026317.2</a> Length: 1342940 Number of Matches: 2                |                                                              |                         |                          |                                                               |
| Range 1: 1061535 to 1062386                                                                 |                                                              | <a href="#">GenBank</a> | <a href="#">Graphics</a> | <a href="#">▼ Next Match</a> <a href="#">▲ Previous Match</a> |
| Score                                                                                       | Expect                                                       | Identities              |                          | Gaps                                                          |
| 893 bits(483)                                                                               | 0.0                                                          | 738/855(86%)            |                          | 42/855(4%)                                                    |
|                                                                                             |                                                              |                         |                          | Strand                                                        |
|                                                                                             |                                                              |                         |                          | Plus/Plus                                                     |
| Query 1                                                                                     | ATGGCGCCCTATAGCATGTGTACTCTTGGCGCCCTCTCAATCCTTGGGTTTGGGGCTTAT |                         |                          | 60                                                            |
| Sbjct 1061535                                                                               | ATGGCGCCCTATAGCATGTGTACTCTTGGCGCCCTCTCAATCCTTGGGTTTGGGGCTTAT |                         |                          | 1061594                                                       |
| Query 61                                                                                    | GCTCAAGAGCGTGGCTTGGAGAACCCAGATATTTTCAACTTGACCTACACGGAATAT    |                         |                          | 120                                                           |
| Sbjct 1061595                                                                               | GCTCAAGAGCGTGGCTTGGAGAACCCAGATATTTTCAACTTGACCTACACGGAATAT    |                         |                          | 1061654                                                       |
| Query 121                                                                                   | CTGGATAAGGTGGCAGCATCCACGGGAGTTCCAGACGAGTGATTGCCGTGGAATGAC    |                         |                          | 180                                                           |
| Sbjct 1061655                                                                               | CTGGATAAGGTGGCAGCATCCACGGGAGTTCCAGACGAGTGATTGCCGTGGAATGAC    |                         |                          | 1061714                                                       |
| Query 181                                                                                   | ACTATGAGCGGCTTTCTCG-----GAACGAGACGGGACG                      |                         |                          | 216                                                           |
| Sbjct 1061715                                                                               | ACTATGAGCGCTTTCTCGGAACGAGACGGACGATAGTGTTCAGACCGAGACGGGACG    |                         |                          | 1061774                                                       |
| Query 217                                                                                   | AGCCTATCGAGCGTGGTGCATTGTCAACCTTGGAAAGCGTGACCTGTCCGGCGGGAG    |                         |                          | 276                                                           |
| Sbjct 1061775                                                                               | AGCCTATCGAGCGTGGTGCATTGTCAACCTTGGAAAGCGTGACCTGTCCGGCGGGAG    |                         |                          | 1061834                                                       |
| Query 277                                                                                   | GCTCACAAATCGGTACCAATGACATGCTCAGGCGCTTCATGATCTGTGTTGAA        |                         |                          | 336                                                           |
| Sbjct 1061835                                                                               | TCTCACAAATCGGTACCAATGACATGCTCAGGCGCTTCATGATCTGTGTTGAA        |                         |                          | 1061894                                                       |
| Query 337                                                                                   | GCATATGGACAGCGTGGCAGCGATTAGTGGTCTGT--CA-AGA-C--CAGGCAACG     |                         |                          | 390                                                           |
| Sbjct 1061895                                                                               | AAATATGGACAGCGTGGCAGCGATTAGTGGGTATGTTACACTGATCTGTCGGCGACT    |                         |                          | 1061954                                                       |
| Query 391                                                                                   | AGCGTATCTATTGTGGGATCGAATGCTCGCGGTCCTCCGG--CGGATGA--CGACAGAG  |                         |                          | 448                                                           |
| Sbjct 1061955                                                                               | AGGAAATCGAATGATTAATAAACCTGCTGTC--AGGAGAGACAGATCAGTGACAGAG    |                         |                          | 1062012                                                       |
| Query 449                                                                                   | CTTGCCCA-AGCGCGCAGCAGTGACACACTTTGAGGCGGTCAATTATCGT-AGCGT---  |                         |                          | 503                                                           |
| Sbjct 1062013                                                                               | CTTGCCCAAG-AGCGAGGTGACACTTTCAATGGTGCAACTTTCTGACCTGCAC        |                         |                          | 1062071                                                       |
| Query 504                                                                                   | C--CGGAATATTTTCTCTGTCTGTGGGCCCCGAATTGAGGTGAGGGAAGACATGATATA  |                         |                          | 561                                                           |
| Sbjct 1062072                                                                               | CATCAGGTACTTTTCTCTGTCTGTGGGCCCCGAATTGAGGTGAGGGAAGACATGATATA  |                         |                          | 1062131                                                       |
| Query 562                                                                                   | GGGATTCACACGGAATGGGACGGAATCTGTACCCGTAATCGCTTAATCGCTGGGACC    |                         |                          | 621                                                           |
| Sbjct 1062132                                                                               | GGGATTCACACGGAATGGGAGGGAATCTGTGACCCGGAATCGCTTAATCGCTGGGACC   |                         |                          | 1062191                                                       |
| Query 622                                                                                   | TACGATCTTTGCCAGATGGCGGGGAGTCTCAATGGGTACTTCAACTTTGATGGTCT     |                         |                          | 681                                                           |
| Sbjct 1062192                                                                               | TACGATCTTTGCCAGATGGCGGGGAGTCTCAATGGGTACTTCCGGTATGACGGTCT     |                         |                          | 1062251                                                       |
| Query 682                                                                                   | TATTCGAATGGAGGGGATGAGCTCTCGGGGAATGAGCACTCTGGTCTGATGATTGCT    |                         |                          | 741                                                           |
| Sbjct 1062252                                                                               | TATTCGGATGGATATAAGACGAGCTCTCACGGATATGGACATTATGGTCTGATCAAT    |                         |                          | 1062311                                                       |
| Query 742                                                                                   | TGCCGGGAGGCAAGCTGACTATCACTAGCACAGATCGCGCAACTTGGGCGATTGGATAT  |                         |                          | 801                                                           |
| Sbjct 1062312                                                                               | TGCCGGGAGGCAAGCTGACTATCACTAGCACAGATCGCGCAACTTGGGCGATTGGATAT  |                         |                          | 1062371                                                       |
| Query 802                                                                                   | ACCAGCCCCCACTAA 816                                          |                         |                          |                                                               |
| Sbjct 1062372                                                                               | ACCAGCCCCCACTAA 1062386                                      |                         |                          |                                                               |

B.

Results for linear 816 residue sequence "KX434998.1 Foc TR4 BRIP40340 secreted in xylem 1 (SIX1) gene, complete cds" starting "ATGGCGCCCT"

|     |                                                                                                           |                    |
|-----|-----------------------------------------------------------------------------------------------------------|--------------------|
| 1   | ATGGCGCCCTATAGCATGTGTACTCTTGGCGCCCTCTCAATCCTTGGGTTTGGGGCTTATGCTCAAGAGSCTGCGGTTGAGGGAACCCAGATATTTTTCACCTTG |                    |
| 1   | 10 20 30 40 50 60 70 80 90 100                                                                            |                    |
| 1   | TACCGCGGGATATCGTACCATGAGGAACCGCGGAGAGTTAGGAACCCAAACCCGAATACGAGTTCTCCGAGCCAACTCCTTGGGGTCTATAAAAAAGTTGAAC   | >>>F>>> 162 to 181 |
| 106 | ACCTACACGGAATATCTGGATAAGGTGGCAGCATCCCCAGGAGTTCCAGACAGAGTGATTGCGTGGAATGACACTATGAGCGGGTTTCTGGGAACGAGAGG     |                    |
| 106 | 110 120 130 140 150 160 170 180 190 200                                                                   |                    |
| 106 | TGGATGTGCTTATAGACCTATTCCACCGTGTGAGGGTGCCTCAAGGGTCTGCTCACTAAACGGCACCTTACTGTGATACTCGCGAAAGGACCCCTTGCTCTGC   |                    |
| 211 | GGCAGCAGCTATCGAGGCGTGGTGCATTGTCAACCTTGGAAAGCGTGACCTGTGCGGGGGAGGCTCACAACTACGCTCACCAATGAGCATGCTCCAGGGCG     |                    |
| 211 | 220 230 240 250 260 270 280 290 300 310                                                                   |                    |
| 211 | CGGTGCTGATAGCTCCGACACGCGTACAGTTGGAACCTTTCGCACTGGGACAGCGGCCCTCCGAGTGTGTTAGCGCAGTGAGTTACTGTACGAGGTCGCG      | >>>R>>> 366 to 383 |
| 316 | CTTCATGATCTGTGTGTTGAAGCATATGGCAGGCTGGGAGCGATTAGTGGTCTGTGTCAAGACCAGGCAACGAGGCGTATCTATTGTGGGAATCGGAATGTC    |                    |
| 316 | 320 330 340 350 360 370 380 390 400 410                                                                   |                    |
| 316 | GAAGTACTAGACACAACCTTCTGATACCGTGTCCGACGCTCGCTAATCACCCAGCACAGTTCTGGTCCGTTGCTCCGCATAGATAACACCCCTTAGGCTTACAG  |                    |
| 421 | GCTGGGTCCCGCGGATGACGACACGAGCTTGCCCAAGCGGCGAGCAGTGCACCACTTTCGAGGCGGTCAATTATCGTAGCGTCCGGAATATTTTCTGCTCTGT   |                    |
| 421 | 430 440 450 460 470 480 490 500 510 520                                                                   |                    |
| 421 | CGACCCAGGSCCGCTTACTGCTGCTCAGCGGGTTCGCGGCTGTCACGTGGTGAAGCTCCGCGAGTTAATAGCATCGCAGGSCCTATAAAAAAGCAGACACA     |                    |
| 526 | GGGCCCCGAATTGAGGTGACGGAGAGACATGATATAGGATTACACAGGAATGGGACGGAATCTGCTACCTGAATCGCTTAATCGGCTGGGACCTACGATTCT    |                    |
| 526 | 530 540 550 560 570 580 590 600 610 620                                                                   |                    |
| 526 | CCCGGGGCTTAACCTCACTGCTCTGCTACTATATCCCTAAGTGTGCTTACCTGCTTAGACCATGGGACTTAGCGGATTTAGCGGACCCCTGGATGCTAAGA     |                    |
| 631 | TTGCGCCAGATGGCGGGCAGTCTCAATGGGTACTTCAACTTTGATGGTCTTATCGAATGGAGAGGGATGAGCTCTCGGGGAAGTGGACACTCGTGGTCAATGC   |                    |
| 631 | 640 650 660 670 680 690 700 710 720 730                                                                   |                    |
| 631 | AAGCGGCTTACCGCGCGTCAGAGTTACCCATGAAGTTGAACCTACCACGAATAAGCTTACCTCTCCCTACTCGAGAGGCCCTTCACTGTGAGCACCAAGTACG   |                    |
| 736 | ATTGCTTGGCCGGGAGGCAAGCTGACTATCACTAGCACAGATCGCGCAACTTGGGCGATTGGATATACCGCCCCCACTAA                          |                    |
| 736 | 740 750 760 770 780 790 800 810                                                                           |                    |
| 736 | TAACGAACGGGCCCTCCGTTGCTAGTATAGTATGCTGCTAGCGGTTGAACCGCTAACCTATATGGTGGGGGTGATT                              |                    |

Supplementary Figure S4. Forward and reverse primers binding site (A) and multiple sequence alignment of SIX7a (B) for *Foc* STR4 of *Foc*STR4F/*Foc*STR4R.

A.

Results for linear 663 residue sequence "KM503196.1 Foc STR4\_SIX7" starting "ATGCAGGTTA"

```
1 ATGCAGGTTATGAAGTACCTTTACCTCCTTTTCCATTTGCGCCTGTTTGGAGTGCTATACCTGGACTTGATCTC
1      10      20      30      40      50      60      70
1 TACCTCCAACTACTTTCATGGAATGAGGAAAAGGTAAAGCGGGACAAACGCTCACGATATGGACCTGAAC TAGAG
76 TTTCCAAAGGCAAGGGCTATGCTTTAGCACCACTCAAGAGCAGCAGGACCACCAGAAAGGCCTACTGAGGTGACA
76      80      90      100     110     120     130     140
76 AAAGGTTCCGTTCCCGATACGAAATCGTGGTTGAGTTCTCGTCGTCCTGGTGGTCTTTCCGGATGACTCCACTGT
151 TTTGACATCACCGAGAATGTCAACACGTTCAACGAGTCACGCGCGCATCCACACCATGGACTCAGGGGTAGGACTCTCG
151      160     170     180     190     200     210     220
151 AAACGTGTAGTGGCTCTTACACTGTGTCAAGTGGCTGCGGGCTAGGTGTGTACCTGAGTCCCACATCCTGAGAGC
226 AATATTAGATACCAATGGCGCGCATACTACAGTACAGGCGCAAACTACATTCGTTGAGGTTGAGGTTTTCGGT
226      230     240     250     260     270     280     290
226 TTATAATCTCTATGTTTACCGCGGTATGATGTATGTTGCTCGCTGTTTGATGTAAGCAACTCCAAGTCCAAAAGCCA
      >>>F>>> 310 to 329
301 ACTCGCGAGCGGCAACTACTCTTCTGCTTCCGGATGCTCCCGCAACAGCTCAATGGCGCCCTATCAATACCGACCTC
301      310     320     330     340     350     360     370
301 TGACGGCTCCGCTTCATCAGAACGAAGGCTACGAGGGGCTTGCCAGTTACCGGCGGATAGTTATCGCTGCAG
376 CTTAGGCCCAATGAAGGGTCACTGGCGGTGGTGTAGGGGGCTGGGGTCTGGGTGACTCCGGTCTGCTTCAAACT
376      380     390     400     410     420     430     440
376 GAATCCGGGTTACTTTCCAGTGACCGCCACCAAGATCCCGCGACCCAGCCCACTGAGGCCAGAGCGAGATTGA
451 TTTGCTCGAGAGATATTAGGTATCGSCTCCGGATTCAAGTAAGCCCAAGCACTCTTACCCGCTTGAAGTCATT
451      460     470     480     490     500     510     520
451 AAACGAGCTCTCTATAATCCATAGCCGAGGCCCTAAGTTGCATTGCGGTTCGTGAGGATGGGGGAATTCAGTAA
      >>>R>>> 538 to 554
526 CCTGGGAGGCAATACGCCAACCGCTTAATGAATGCCGTCGCTACGCGAAAACCCCTCAGATGATTATAAGCCC
526      530     540     550     560     570     580     590
526 GGACCTCCGTTATGCGGTTGGCGAATTACTTACGGGACGAGTCGGGTTTGGGGAGTCTACTAAATATTCGGG
601 AGGGGCGCTTGCTGATTTCGTTTTCATAGTTTTTAACACAGCAGAGTTTGTAGTAATCTGTAG
601      610     620     630     640     650     660
601 TCCCGGGAACGACTAAAAGCAAAAGTATCAAAATTTGTGTGCTCTCAACATCATTTAGACATC
```

B.

**Fusarium oxysporum f. sp. cubense isolate VCG0120 chromosome 14, whole genome shotgun sequence**  
Sequence ID: **CM028826.1** Length: **1838343** Number of Matches: **1**

| Range 1: 1288728 to 1289395 |                                                                 | GenBank      | Graphics | ▼ Next Match | ▲ Previous Match |
|-----------------------------|-----------------------------------------------------------------|--------------|----------|--------------|------------------|
| Score                       | Expect                                                          | Identities   |          | Gaps         | Strand           |
| 1090 bits(590)              | 0.0                                                             | 644/669(96%) |          | 7/669(1%)    | Plus/Plus        |
| Query 1                     | ATGCAGGTTATGAAGTACCTTTACCTCCTTTTCCATTTGCGCCTGTTTGGAGTGCTATA     |              |          |              | 60               |
| Subjct 1288728              | ATGCAGATTATGAAGTACCTTTACCTCCTTTTCCATTTGCGCCTGTTTGGAGTGCTATA     |              |          |              | 1288787          |
| Query 61                    | CCTGGACTTGATCTCTTTCCAAAGGCAAGGGCTATGCTTTAGCACCA---ACTCAAGAGCA   |              |          |              | 117              |
| Subjct 1288788              | CCTGGACTTGATCTCTTTCCAAAGGCAAGGGCTATGCTTTAGCACCACTCCGGCTCAACACCA |              |          |              | 1288847          |
| Query 118                   | GCAGGACCCACGAAAGGCTACTGAGGTGACATTTGACATCACCAGAAATGTCACACAG      |              |          |              | 177              |
| Subjct 1288848              | CCACGACCAACACCCCGCGCTAGAGAGGTGACATTTGACATCACCAGAAATGTCACACAG    |              |          |              | 1288907          |
| Query 178                   | TTACCGAGCGCGCATCCACACATGAGTCAAGGTTAGGACTCTCGAATATTAGATAC        |              |          |              | 237              |
| Subjct 1288908              | TTACCGAGCGCGCATCCACACATGAGTCAAGGTTAGGACTCTCGAATATTAGATAC        |              |          |              | 1288967          |
| Query 238                   | CAATGGCGCGCATACTACAGTACAGGCGACAAACTACATTCGTTGAGGTTGAGGTTTTTC    |              |          |              | 297              |
| Subjct 1288968              | CAATGGCGCGCATACTACAGTACAGGCGACAAACTACATTCGTTGAGGTTGAGGTTTTTC    |              |          |              | 1289027          |
| Query 298                   | GGTACTGCCGAGGCGCAAGTAGTCTTGCTTCCGGATGCTCCCGCAACAGGTCAATGGCGC    |              |          |              | 357              |
| Subjct 1289028              | GGTACTGCCGAGGCGCAAGTAGTCTTGCTTCCGGATGCTCCCGCAACAGGTCAATGGCGC    |              |          |              | 1289087          |
| Query 358                   | GCATCAATAGCGACCTCTTAGGCCC AATGAAGGGTCACTGGCGGTGGTGTAGGGGGC      |              |          |              | 417              |
| Subjct 1289088              | GCATCAATAGCGACCTCTTAGGCCC AATGAAGGGTCACTGGCGGTGGTGTAGGGGGC      |              |          |              | 1289147          |
| Query 418                   | TGGGGTGGGTGACTCCGGTCTGCTTCAAACTTTTGGTCGG--A--GAGATATTAGGTAT     |              |          |              | 474              |
| Subjct 1289148              | TGGGGTGGGTGACTCCGGTCTGCTTCAAACTTTTGGTCGGCGGAGGAGATATTAGGTAT     |              |          |              | 1289207          |
| Query 475                   | CGGCTCCGATTCAACGTAAAGCCAGGACTCTCAACCCCTTGAAGTCATTCTGGGAGG       |              |          |              | 534              |
| Subjct 1289208              | CGGCTCCGATTCAACGTAAAGCCAGGACTCTCAACCCCTTGAAGTCATTCTGGGAGG       |              |          |              | 1289267          |
| Query 535                   | CAATACGCGCAACCGCTTAATGAATGCCGCTCGTACGCGCAAAACCTTCAGATGATTAT     |              |          |              | 594              |
| Subjct 1289268              | CAATACGCGCAACCGCTTAATGAATGCCGCTCGTACGCGCAAAACCTTCAGATGATTAT     |              |          |              | 1289327          |
| Query 595                   | AMGCCAGGGGGCTTGCTGATTTCGTTTTCATAGTTTAAACACAGCAGAGTTTGTAGTA      |              |          |              | 654              |
| Subjct 1289328              | AMGCCAGGGGGCTTGCTGATTTCGTTTTCATAGTTTAAACACAGCAGAGTTTGTAGTA      |              |          |              | 1289386          |
| Query 655                   | AATCTGTAG 663                                                   |              |          |              |                  |
| Subjct 1289387              | AATCTGTAG 1289395                                               |              |          |              |                  |
